# Supplementary material
Source: publisher figshare collection journal article supplement (https://frontiersin.figshare.com/ndownloader/files/20024750)
Supplement: Supplementary file 1 [file 20024750]

**Supplementary material S2**. Sampling sites during the expedition to Jardines de La Reina archipelago. N = sample size. The sites are labeled as JR, the number (1–13), and the sampling point (A or B) within each site.

| Site | Sampling date | Name | Latitude (N) | Longitude (W) | Depth (m) | N | Notes |
| --- | --- | --- | --- | --- | --- | --- | --- |
| JR1A | 20/11/2017 | Médanos de La Vela | 21 18.351 | 79 35.556 | 10 | 10 | Terrace + Spur and grooves |
| JR1B | 20/11/2017 | Médanos de La Vela | 21 18.200 | 79 35.464 | 11 | 10 | Terrace + Spur and grooves |
| JR2A | 19/11/2017 | Canal de Bretón | 21 11.029 | 79 32.738 | 10 | 10 | Terrace + Spur and grooves |
| JR2B | 19/11/2017 | Canal de Bretón | 21 11.563 | 79 33.026 | 10 | 10 | Terrace + Spur and grooves |
| JR3A | 4/11/2017 | S Cayo Bretón | 21 03.842 | 79 25.455 | 11 | 7 | Spur and groove |
| JR3B | 4/11/2017 | S Cayo Bretón | 21 03.825 | 79 25.635 | 14 | 10 | Spur and groove |
| JR4A | 6/11/2017 | S Cayo Boca Grande | 20 58.030 | 79 11.847 | 12 | 10 | Terrace (8–16 m), clear water |
| JR4B | 6/11/2017 | S Cayo Boca Grande | 20 57.924 | 79 12.273 | 12 | 10 | Terrace (8–16 m), clear water |
| JR5A | 17/11/2017 | S Cayo Caballones | 20 51.286 | 79 02.910 | 9 | 10 | Terrace + Spur and grooves |
| JR5B | 17/11/2017 | S Cayo Caballones | 20 50.968 | 79 02.238 | 9 | 9 | Terrace + Spur and grooves |
| JR6A | 7/11/2017 | S Cayo Caballones | 20 50.612 | 79 00.546 | 12 | 10 | Terrace (8–17 m), clear water |
| JR6B | 7/11/2017 | S Cayo Caballones | 20 50.634 | 79 01.299 | 12 | 10 | Terrace (8–17 m), clear water |
| JR7A | 12/11/2017 | Cayo Anclitas | 20 46.464 | 78 54.922 | 9 | 10 | Terrace (7–24 m) |
| JR7B | 12/11/2017 | Cayo Anclitas | 20 46.500 | 78 55.134 | 9 | 10 | Terrace (7–24 m) |
| JR8A | 14/11/2017 | Cayo Boca de La Piedra | 20 45.233 | 78 50.238 | 9 | 9 | Terrace (7–16 m) |
| JR8B | 14/11/2017 | Cayo Boca de La Piedra | 20 45.409 | 78 50.402 | 9 | 10 | Terrace (7–16 m) |
| JR9A | 16/11/2017 | Cayo Piedra Grande | 20 43.004 | 78 47.758 | 14 | 10 | Terrace (7–17 m), turbid water |
| JR9B | 16/11/2017 | Cayo Piedra Grande | 20 42.751 | 78 47.262 | 14 | 10 | Terrace (7–17 m), turbid water |
| JR10A | 10/11/2017 | Cayo Cachiboca | 20 40.376 | 78 45.187 | 8 | 10 | Terrace (7–16 m) |
| JR10B | 10/11/2017 | Cayo Cachiboca | 20 40.802 | 78 45.275 | 12 | 10 | Terrace (7–16 m) |
| JR11A | 10/11/2017 | Pasa Juan Grin | 20 37.612 | 78 35.676 | 9 | 10 | Terrace (8–16 m) |
| JR11B | 10/11/2017 | Pasa Juan Grin | 20 37.446 | 78 35.326 | 12 | 10 | Terrace (8–16 m) |
| JR12A | 8/11/2017 | S Cayo Caguama | 20 34.746 | 78 26.949 | 9 | 10 | Terrace (8–16 m), clear water |
| JR12B | 8/11/2017 | S Cayo Caguama | 20 34.747 | 78 26.563 | 6 | 10 | Terrace (8–16 m), clear water |
| JR13A | 9/11/2017 | Punta Cabeza del Este | 20 30.788 | 78 23.179 | 10 | 10 | Terrace (7–14 m) |
| JR13B | 9/11/2017 | Punta Cabeza del Este | 20 30.390 | 78 22.864 | 8 | 10 | Terrace (7–14 m) |
